1 Number of ICD-10 diagnosis fields required to capture sepsis in  
2 administrative data and truncation bias: A nationwide prospective  
3 registry study  
4

5 Nina Vibeche Skei <sup>1,2</sup>, Jan Kristian Damås <sup>2,3,4</sup>, Lise Tuset Gustad <sup>5,6</sup>

6

- 7 1. Department of Intensive Care and Anesthesia, Nord-Trøndelag Hospital Trust, Levanger, Norway.  
8 2. The Mid-Norway Centre for Sepsis Research, Institute of Circulation and Medical Imaging, Norwegian  
9 University of Science and Technology (NTNU), Trondheim, Norway  
10 3. Centre of Molecular Inflammation Research, Institute for Clinical and Molecular Medicine, Norwegian  
11 University of Science and Technology (NTNU), Trondheim, Norway  
12 4. Department of Infectious Diseases, St. Olav's University Hospital, Trondheim, Norway  
13 5. Faculty of Nursing and Health Sciences, Nord University, Levanger, Norway.  
14 6. Department of Medicine and Rehabilitation, Levanger Hospital, Nord-Trøndelag Hospital Trust, Levanger,  
15 Norway  
16

17

18 Corresponding author: Nina Vibeche Skei, [ninavibeche.skei@helse-nordtrondelag.no](mailto:ninavibeche.skei@helse-nordtrondelag.no)

19

20

21

22

23

24

25

26

27

28

29

30

31

32

33

34

**NOTE: This preprint reports new research that has not been certified by peer review and should not be used to guide clinical practice.**

## 35 Abstract

36 Background: In observational studies that uses administrative data, it is essential to report  
37 technical details such as the number of International Classification of Disease (ICD) coding  
38 fields extracted. This information is crucial for ensuring comparability between studies and  
39 for avoiding truncation bias in estimates, particularly for complex conditions like sepsis.

40 Specific sepsis codes (explicit sepsis) is suggested identified by extracting 15 diagnosis fields,  
41 while for implicit sepsis, comprising an infection code combined with an acute organ failure,  
42 the number of diagnosis field remains unknown.

43 Objective: The objective was to explore the necessary number of diagnosis fields to capture  
44 explicit and implicit sepsis.

45 Materials and methods: We conducted a study utilizing The Norwegian Patient Register  
46 (NPR), which encompasses all medical ICD-10 codes from specialized health services in  
47 Norway. Data was extracted for all adult patients with hospital admissions registered under  
48 explicit and implicit sepsis codes from all Norwegian hospitals between 2008 through 2021.

49 Results: In 317,705 sepsis admissions, we observed that 105,499 ICD-10 codes were  
50 identified for explicit sepsis, while implicit sepsis was identified through 270,346  
51 codes for infection in combination with 240,586 codes for acute organ failure. Through our  
52 analysis, we found that 55.3%, 37.0%, and 10.0% of the explicit, infection, and acute organ  
53 failure codes, respectively, were documented as the main diagnosis. The proportion of  
54 explicit and infection codes peaked in main diagnosis field, while for acute organ failure  
55 codes this was true in the third diagnosis field. Notably, the cumulative proportion reached  
56 99% in diagnosis field 11 for explicit codes and in diagnosis field 14 for implicit codes.

57 Conclusion: Expanding the utilization of multiple diagnosis fields can enhance the  
58 comparability of data in epidemiological studies, both internationally and within countries.  
59 To make truncation bias visible, reporting guidelines should specify the number of diagnosis  
60 fields when extracting ICD-10 codes.

61

## 62 Introduction

63

64 International Classification of Disease (ICD) codes are used to describe patients' clinical  
65 characteristics and outcomes in hospital records, and these are often abstracted for  
66 research purposes [1]. Extraction of sepsis ICD codes involves specific sepsis codes (explicit  
67 sepsis) and implicit sepsis code strategy [2, 3]. The latter consist of a combination of two  
68 codes, i.e. a code for infection and a code for acute organ dysfunction. Thus, sepsis  
69 extraction strategy must involve both main condition and secondary diagnosis fields.

70

71 Previous research has revealed that increasing number of secondary diagnosis fields for  
72 explicit sepsis codes increases the accuracy of measurement, and that certain sepsis  
73 conditions are particularly prone to truncation bias if one does not examine six or more  
74 secondary diagnosis codes [4]. However, recommendations for how many secondary  
75 diagnosis fields that are needed to capture implicit sepsis are sparse.

76 Therefore, the aim of this study was to assess the number of diagnosis field needed to  
77 capture explicit and implicit sepsis.

78

## 79 Materials and methods

80 We conducted a prospective descriptive registry study using The Norwegian Patient Register  
81 (NPR) that include all medical ICD-10 codes from specialized health services in Norway and  
82 has a good coverage [5, 6]. In NPR, an unlimited number of diagnosis can be reported [7],  
83 however, due privacy considerations and protection, we extracted ICD-10 codes from the  
84 main condition, the main joined condition, and up to 19 other conditions (secondary  
85 diagnosis field).

86 Sepsis was identified and classified using ICD-10 codes based on the Sepsis-3 definition [8].  
87 The extraction was performed at the individual level for all patients over 18 years old with  
88 hospital admissions registered using ICD-10 codes for infection in combination with acute  
89 organ failure (implicit sepsis) and specific sepsis codes (explicit sepsis) from all Norwegian  
90 hospitals during the period from January 1, 2008, to December 31, 2021. Clinical sepsis  
91 codes (R-codes; e.g. R57.2 septic shock) is only valid in national guidelines in combination  
92 with other codes (e.g. infection code)[6], thus the R-codes were included in acute organ  
93 failure category. Infection, acute organ failure, and explicit sepsis codes were classified as  
94 binary variables (0 and 1), i.e. either absent or present. These codes were retrieved from the  
95 main diagnosis fields, main joined diagnosis field, and 19 secondary diagnosis fields. As the  
96 percentage of ICD-10 codes in the joined diagnosis field to main diagnosis was only 0.1% in  
97 each category, we merged the joined diagnosis field with main diagnosis and named the  
98 diagnosis field 1. The secondary diagnosis fields were denoted as diagnosis field 2 through  
99 20. Details on the ICD-10 codes extracted are priory published [3].

100

## 101 **Statistical Analysis**

102 For every diagnosis field, we counted the number of explicit sepsis, infection, and acute  
103 organ failure ICD-10 codes and calculated the proportion by dividing the number of each  
104 code by the total number of corresponding diagnoses. We then reported the proportion of  
105 codes per group (explicit, infection, or acute organ failure) for each diagnosis field, as well as  
106 the cumulative proportion. We used the Stata software package (version 16, Stata Corp, TX,  
107 USA) for all statistical analyses.

## 108 **Ethics**

109 The study was approved by the Regional Committee for Medical and Health Research Ethics  
110 in Eastern Norway (2019/42772) and the Data Access Committee in Health North-Trøndelag  
111 (2021/184). The analyses were conducted in the Services for Sensitive Data at the University  
112 of Oslo.

113

## 114 **Results**

115

116 Among 12.6 million discharges from 2008 through 2021, a total of 317 705 patients was  
117 identified with more than one ICD-10 sepsis code. Of these, 105 499 ICD-10 codes were  
118 identified for explicit sepsis, while implicit sepsis was identified through 270 346  
119 codes for infection in combination with 240 586 codes for acute organ failure (Table 1).

120

**Table 1. Number of ICD-10 sepsis codes in main and 19 secondary diagnosis fields**

| Diagnosis field        | ICD-10 category          |                          |                     |
|------------------------|--------------------------|--------------------------|---------------------|
|                        | Explicit, n <sup>1</sup> | Implicit, n <sup>1</sup> |                     |
| Diagnosis field number |                          | Infection                | Acute organ failure |
| 1                      | 58284                    | 100 078                  | 23868               |
| 2                      | 24600                    | 46657                    | 38170               |
| 3                      | 7158                     | 32091                    | 48497               |
| 4                      | 4240                     | 24800                    | 39267               |
| 5                      | 3052                     | 19076                    | 29110               |
| 6                      | 2408                     | 14180                    | 20229               |
| 7                      | 1765                     | 10198                    | 13654               |
| 8                      | 1207                     | 7382                     | 9241                |
| 9                      | 765                      | 4429                     | 5648                |
| 10                     | 522                      | 3025                     | 3806                |
| 11                     | 409                      | 2202                     | 2605                |
| 12                     | 298                      | 1643                     | 1872                |
| 13                     | 201                      | 1201                     | 1292                |
| 14                     | 141                      | 882                      | 968                 |
| 15                     | 131                      | 707                      | 697                 |
| 16                     | 99                       | 515                      | 514                 |
| 17                     | 75                       | 409                      | 370                 |
| 18                     | 55                       | 359                      | 315                 |
| 19                     | 48                       | 263                      | 254                 |
| 20                     | 41                       | 249                      | 209                 |
| Total                  | 105 499                  | 270 346                  | 240 586             |

<sup>1</sup>n= number

121

122 The main condition was recorded in 55.3% of the explicit codes, 37.0% of the infection  
 123 codes and 10.0% of the acute organ dysfunction codes. The proportion of explicit and  
 124 infection codes peaked in main diagnosis field, while for acute organ failure codes this was  
 125 true in the third diagnosis field (Fig 1). Over 99% of the explicit sepsis cases were covered by  
 126 diagnosis field 11, and the same yield for infection and acute organ failure codes in  
 127 diagnosis field 14 (Fig 2).

128 **Fig 1. Number and (%) of ICD-10 codes in diagnoses field one through 20 for explicit sepsis,**  
 129 **infection and organ dysfunction sepsis codes.**

130 **Fig 2. The cumulative percentage of ICD-10 codes for explicit sepsis, infection and organ**  
131 **dysfunction sepsis codes by diagnosis field 1 through 20.**

## 132 Discussion

133 In this nationwide article, we present proportions of explicit and implicit codes as main  
134 condition and up to 19 secondary diagnoses. Our findings reveals that the majority of  
135 explicit codes (55%) was listed as main condition, while this yield for only 37% of the  
136 infection codes and for 10% of the acute organ failure codes. Notably, cumulative  
137 proportion reached 99% in diagnosis field 11 and 14 for explicit and implicit codes,  
138 respectively.

139 To our knowledge, no previous study has examined the necessary medical diagnosis fields to  
140 extract implicit sepsis. Our findings of how many diagnosis fields requited to capture explicit  
141 sepsis are somewhat lower than a previous study commissioned by the World Health  
142 Organization investigating postoperative explicit sepsis codes among twenty countries  
143 suggesting that at least 15 secondary diagnosis fields is optimal for relevant clinical  
144 information using ICD-10 codes [4]. Unlike postoperative sepsis, it is probable that a non-  
145 postoperative sepsis admission (e.g. acute sepsis) will be classified as a primary or at least as  
146 an early secondary diagnosis. Therefore, our wider inclusion of specific sepsis codes may  
147 account for the differing outcome.

148

149 Information about the number diagnosis fields used during extraction of data is missing in  
150 reporting guidelines for observational studies [9]. One of the challenges when comparing

151 studies is the differences in national ICD-10 coding guidelines. A prior sepsis ICD coding  
152 validation study of 22 international studies on a population level compared five strategies  
153 [10]. They found that R-codes and explicit sepsis coding strategies may underestimate sepsis  
154 incidence by 3.5-fold and 3-fold, respectively. However, in many of these epidemiological  
155 studies of sepsis, information about the technical extraction strategy involving the number  
156 of diagnosis fields is missing, making it difficult to compare national sepsis incidence. Our  
157 study has revealed that extracting sepsis codes of less than 11 diagnosis fields for explicit  
158 and 14 fields for implicit sepsis may introduce a truncation bias, potentially leading to  
159 underestimation of incidence.

160

161 Our study boasts several notable strengths. Firstly, it draws on data from all public hospitals  
162 in Norway spanning 14 years. Secondly, the comprehensive assessment of diagnosis fields  
163 used to identify sepsis, covering implicit and explicit sepsis codes, adds to the robustness of  
164 our findings. Thirdly, in Norway, reporting ICD-10 codes to NPR is obligatory and undergoes  
165 quality checks conducted by the National Service of Validation and completeness analysis.  
166 This ensures that our extraction of ICD-10 codes has minimal missing, incomplete, or  
167 unknown discharge codes [7]. Furthermore, the extraction of medical codes for sepsis  
168 identification previous used by other researchers further strengthens the integrity of our  
169 study [2, 11, 12]. Lastly, in contrast to many other countries, available numbers of  
170 secondary diagnosis fields in the data set to capture events are unlimited in Norway [4].  
171 However, in our study we extracted ICD-10 codes from 19 secondary diagnosis fields due to  
172 data minimization. Therefore, we cannot rule out that extraction from more diagnosis fields  
173 could have increased the diagnosis fields needed to capture sepsis.



174

## 175 Conclusion

176 This nationwide study suggest that at least 11 diagnosis fields are required in extraction of  
177 explicit sepsis codes and 14 diagnosis fields to extract implicit sepsis codes. Increasing the  
178 use of multiple diagnosis fields will improve international and intra-national comparability of  
179 data in epidemiological studies. Additionally, it will enhance the quality of analyses, allowing  
180 for better utilization of results. Reporting guidelines should include how many diagnosis  
181 fields used when extracting ICD-10 codes from administrative data in order to make  
182 truncation bias visible.

## 183 Acknowledgement

184 None

185

186

187

## 188 References

189

- 190 1. Quan H, Moskal L, Forster AJ, Brien S, Walker R, Romano PS, et al. International  
191 variation in the definition of 'main condition' in ICD-coded health data. *Int J Qual Health*  
192 *Care*. 2014;26(5):511-5.
- 193 2. Rudd KE, Johnson SC, Agesa KM, Shackelford KA, Tsoi D, Kievlan DR, et al.  
194 Global, regional, and national sepsis incidence and mortality, 1990-2017: analysis for the  
195 Global Burden of Disease Study. *Lancet*. 2020;395(10219):200-11.
- 196 3. Skei NV, Nilsen TIL, Mohus RM, Prescott HC, Lydersen S, Solligård E, et al. Trends  
197 in mortality after a sepsis hospitalization: a nationwide prospective registry study from 2008  
198 to 2021. *Infection*. 2023.

- 199 4. Drösler SE, Romano PS, Sundararajan V, Burnand B, Colin C, Pincus H, Ghali W.  
200 How many diagnosis fields are needed to capture safety events in administrative data?  
201 Findings and recommendations from the WHO ICD-11 Topic Advisory Group on Quality  
202 and Safety. *Int J Qual Health Care*. 2014;26(1):16-25.
- 203 5. Norwegian Patient Registry [Available from:  
204 <https://www.helsedirektoratet.no/english>.  
205 6. ICD-10 og ICD-11: Directorate of e-health; 2022 [updated April 2022. Available  
206 from: <https://www.ehelse.no/kodeverk-og-terminologi/ICD-10-og-ICD-11>.  
207 7. Bakken IJ, Ariansen AMS, Knudsen GP, Johansen KI, Vollset SE. The Norwegian  
208 Patient Registry and the Norwegian Registry for Primary Health Care: Research potential of  
209 two nationwide health-care registries. *Scand J Public Health*. 2020;48(1):49-55.
- 210 8. Singer M, Deutschman CS, Seymour CW, Shankar-Hari M, Annane D, Bauer M, et  
211 al. The Third International Consensus Definitions for Sepsis and Septic Shock (Sepsis-3).  
212 *JAMA*. 2016;315(8):801-10.
- 213 9. network e. Enhancing the QUALity and Transparency Of health Research 2024 [cited  
214 2024 June 26]. Available from: [https://www.equator-network.org/reporting-](https://www.equator-network.org/reporting-guidelines/strobe/)  
215 [guidelines/strobe/](https://www.equator-network.org/reporting-guidelines/strobe/).
- 216 10. Fleischmann-Struzek C, Thomas-Ruddel DO, Schettler A, Schwarzkopf D, Stacke A,  
217 Seymour CW, et al. Comparing the validity of different ICD coding abstraction strategies for  
218 sepsis case identification in German claims data. *PLoS One*. 2018;13(7):e0198847.
- 219 11. Angus DC, Linde-Zwirble WT, Lidicker J, Clermont G, Carcillo J, Pinsky MR.  
220 Epidemiology of severe sepsis in the United States: analysis of incidence, outcome, and  
221 associated costs of care. *Crit Care Med*. 2001;29(7):1303-10.
- 222 12. Martin GS, Mannino DM, Eaton S, Moss M. The Epidemiology of Sepsis in the  
223 United States from 1979 through 2000. *New England Journal of Medicine*.  
224 2003;348(16):1546-54.

225

226

227

228

229

230

231

232

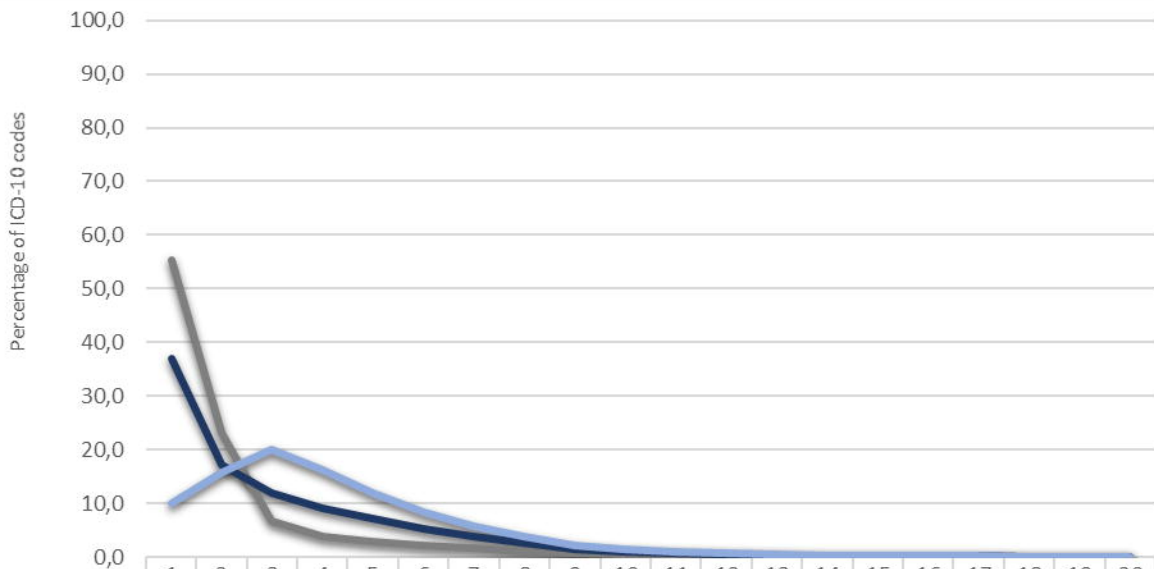

|                                  |      |      |      |      |      |     |     |     |     |     |     |     |     |     |     |     |     |     |     |     |
|----------------------------------|------|------|------|------|------|-----|-----|-----|-----|-----|-----|-----|-----|-----|-----|-----|-----|-----|-----|-----|
|                                  | 1    | 2    | 3    | 4    | 5    | 6   | 7   | 8   | 9   | 10  | 11  | 12  | 13  | 14  | 15  | 16  | 17  | 18  | 19  | 20  |
| Explicit ICD codes               | 55,3 | 23,3 | 6,8  | 4,0  | 2,9  | 2,3 | 1,7 | 1,1 | 0,7 | 0,5 | 0,4 | 0,3 | 0,2 | 0,1 | 0,1 | 0,1 | 0,1 | 0,1 | 0,0 | 0,0 |
| Infection ICD-10 codes           | 37,0 | 17,3 | 11,9 | 9,2  | 7,1  | 5,2 | 3,8 | 2,7 | 1,6 | 1,1 | 0,8 | 0,6 | 0,4 | 0,3 | 0,3 | 0,2 | 0,2 | 0,1 | 0,1 | 0,1 |
| Acute organ failure ICD-10 codes | 10,0 | 15,9 | 20,1 | 16,3 | 12,1 | 8,4 | 5,7 | 3,8 | 2,3 | 1,6 | 1,1 | 0,8 | 0,5 | 0,4 | 0,3 | 0,2 | 0,2 | 0,1 | 0,1 | 0,1 |

Diagnosis field

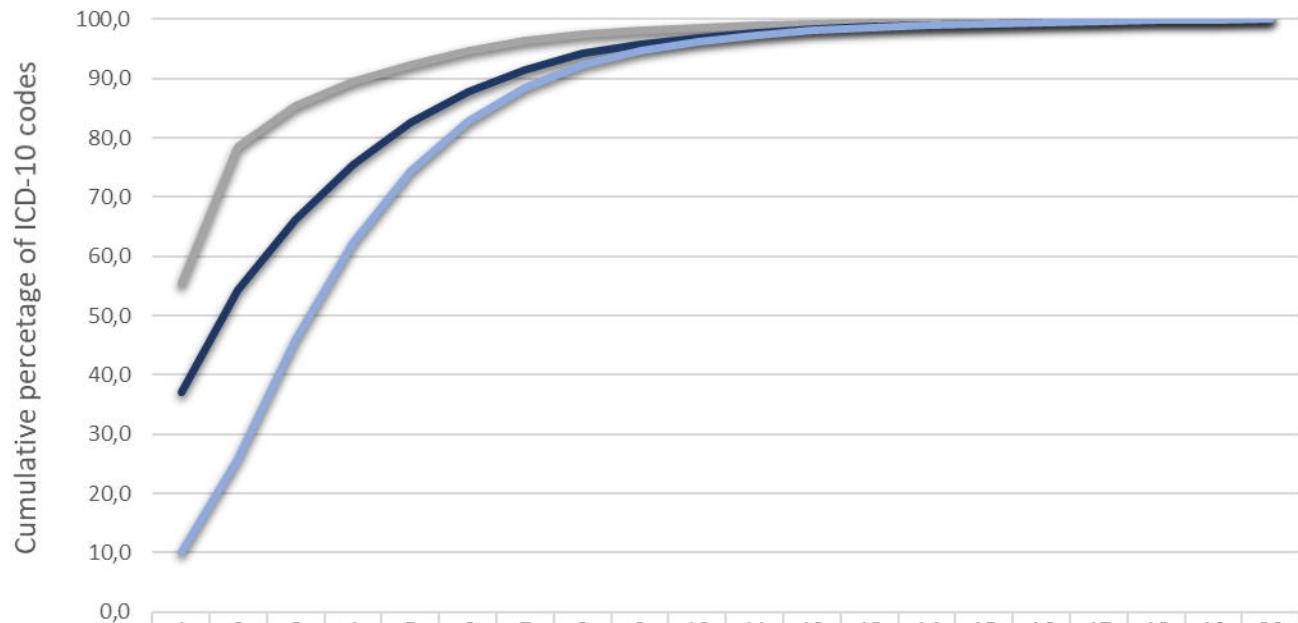

|                                  |      |      |      |      |      |      |      |      |      |      |      |      |      |      |      |      |      |       |       |       |
|----------------------------------|------|------|------|------|------|------|------|------|------|------|------|------|------|------|------|------|------|-------|-------|-------|
| Explicit ICD codes               | 55,3 | 78,6 | 85,4 | 89,4 | 92,3 | 94,6 | 96,3 | 97,4 | 98,1 | 98,6 | 99,0 | 99,3 | 99,5 | 99,6 | 99,7 | 99,8 | 99,9 | 100,0 | 100,0 | 100,0 |
| Infection ICD-10 codes           | 37,0 | 54,3 | 66,2 | 75,4 | 82,5 | 87,7 | 91,5 | 94,2 | 95,8 | 96,9 | 97,7 | 98,3 | 98,7 | 99,0 | 99,3 | 99,5 | 99,7 | 99,8  | 99,9  | 100,0 |
| Acute organ failure ICD-10 codes | 10,0 | 25,9 | 46,0 | 62,3 | 74,4 | 82,8 | 88,5 | 92,3 | 94,6 | 96,2 | 97,3 | 98,1 | 98,6 | 99,0 | 99,3 | 99,5 | 99,7 | 99,8  | 99,9  | 100,0 |

Diagnosis field
